# Supplementary material for: PTTG1 expression is associated with hyperproliferative disease and poor prognosis in multiple myeloma
Source: PubMed Central journal article supplement (PMC4595141; doi:10.1186/s13045-015-0209-2), 2015-10-06

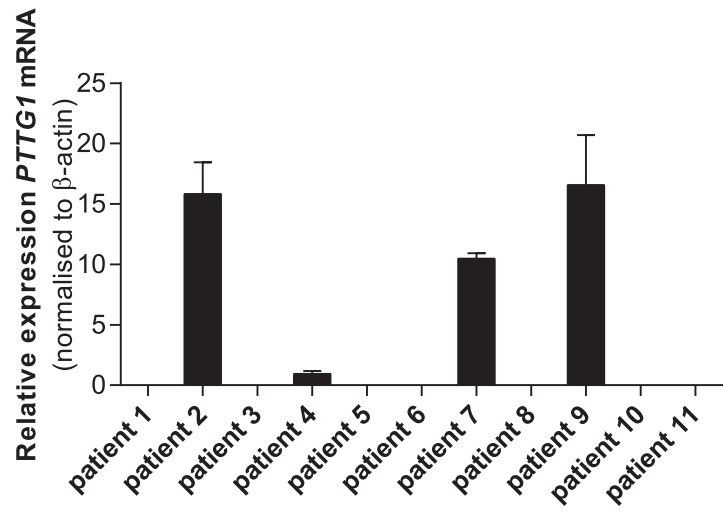

Supplement: 13045_2015_209_MOESM1_ESM.pdf [file 13045_2015_209_MOESM1_ESM.pdf]
